# Supplementary material for: Partition of the electronic energy of the PM7 methodviathe interacting quantum atoms approach
Source: Royal Society of Chemistry journal article supplement (doi:10.1039/d2cp02013k), 2022-01-01
Supplement: d2cp02013k1.pdf [file d2cp02013k1.pdf]

## Partition of the electronic energy of semiempirical methods. Electronic Supporting Information

Hugo Salazar-Lozas<sup>a</sup>, José Manuel Guevara-Vela<sup>b</sup>, Angel Martín Pendás<sup>c</sup>, Evelio Francisco<sup>c</sup> and Tomás Rocha-Rinza<sup>\*a</sup>

### Partition energy of different semiempirical methods

| Partition of the electronic energy of different Semiempirical Methods (SM) |                           |                                  |                                                            |                |             |
|----------------------------------------------------------------------------|---------------------------|----------------------------------|------------------------------------------------------------|----------------|-------------|
| System                                                                     | $\sum_A E_{\text{net}}^A$ | $\sum_{A<B} E_{\text{int}}^{AB}$ | $\sum_A E_{\text{net}}^A + \sum_{A<B} E_{\text{int}}^{AB}$ | $E(\text{SM})$ | Error (mHa) |
| <b>MNDO</b>                                                                |                           |                                  |                                                            |                |             |
| H <sub>2</sub>                                                             | -17.388552                | -10.879203                       | -28.267755                                                 | -28.267756     | 0.000037    |
| N <sub>2</sub>                                                             | -378.519364               | -36.030637                       | -414.550001                                                | -414.550001    | 0.000000    |
| CO                                                                         | -419.504252               | -27.785352                       | -447.289604                                                | -447.289604    | 0.000000    |
| NH <sub>3</sub>                                                            | -211.347405               | -38.849854                       | -250.197259                                                | -250.197259    | 0.000000    |
| HClO                                                                       | -666.236800               | -23.434724                       | -689.671524                                                | -689.671523    | 0.000037    |
| <b>MNDO-D</b>                                                              |                           |                                  |                                                            |                |             |
| H <sub>2</sub>                                                             | -17.388552                | -10.879034                       | -28.267586                                                 | -28.267585     | 0.000037    |
| N <sub>2</sub>                                                             | -378.519618               | -36.029319                       | -414.548937                                                | -414.548937    | 0.000000    |
| Co                                                                         | -419.504569               | -27.783938                       | -447.288507                                                | -447.288507    | 0.000000    |
| NH <sub>3</sub>                                                            | -211.347637               | -38.848902                       | -250.196539                                                | -250.196539    | 0.000000    |
| HClO                                                                       | -572.381843               | -27.802618                       | -600.184461                                                | -600.184459    | 0.000073    |
| <b>AM1</b>                                                                 |                           |                                  |                                                            |                |             |
| H <sub>2</sub>                                                             | -16.368854                | -11.150883                       | -27.519737                                                 | -27.519738     | 0.000037    |
| N <sub>2</sub>                                                             | -378.161946               | -35.950918                       | -414.112864                                                | -414.112864    | 0.000000    |
| CO                                                                         | -418.828480               | -27.185230                       | -446.013710                                                | -446.013709    | 0.000037    |
| NH <sub>3</sub>                                                            | -209.215236               | -39.375591                       | -248.590827                                                | -248.590829    | 0.000073    |
| HClO                                                                       | -684.332305               | -22.405675                       | -706.737980                                                | -706.737978    | 0.000073    |
| <b>PM3</b>                                                                 |                           |                                  |                                                            |                |             |
| H <sub>2</sub>                                                             | -18.749538                | -12.495110                       | -31.244648                                                 | -31.244647     | 0.000037    |
| N <sub>2</sub>                                                             | -292.562330               | -31.662567                       | -324.224897                                                | -324.224898    | 0.000037    |
| CO                                                                         | -383.127525               | -26.635790                       | -409.763315                                                | -409.763314    | 0.000037    |
| NH <sub>3</sub>                                                            | -171.065026               | -37.574889                       | -208.639915                                                | -208.639913    | 0.000073    |
| HClO                                                                       | -601.641752               | -23.555368                       | -625.197120                                                | -625.197119    | 0.000037    |

Table S1: Values of IQA net,  $\sum_A E_{\text{net}}^A$ , interaction,  $\sum_{A<B} E_{\text{int}}^{AB}$ , and total,  $\sum_A E_{\text{net}}^A + \sum_{A<B} E_{\text{int}}^{AB}$ , electronic energies of the molecules considered herein for different semiempirical methods. The chart also displays the values of the molecular energies  $E(\text{PM7})$  computed with MOPAC2016. Atomic units are used throughout except for the error in the recovery of the electronic energy by the IQA partition reported in the last column in mHa..

| Partition of the electronic energy of different Semiempirical Methods (SM) |                           |                                  |                                                            |                |             |
|----------------------------------------------------------------------------|---------------------------|----------------------------------|------------------------------------------------------------|----------------|-------------|
| System                                                                     | $\sum_A E_{\text{net}}^A$ | $\sum_{A<B} E_{\text{int}}^{AB}$ | $\sum_A E_{\text{net}}^A + \sum_{A<B} E_{\text{int}}^{AB}$ | $E(\text{SM})$ | Error (mHa) |
| PM6                                                                        |                           |                                  |                                                            |                |             |
| H <sub>2</sub>                                                             | -15.269572                | -12.769707                       | -28.039279                                                 | -28.039280     | 0.000037    |
| N <sub>2</sub>                                                             | -322.971566               | -34.971743                       | -357.943309                                                | -357.943310    | 0.000037    |
| CO                                                                         | -385.860602               | -25.808080                       | -411.668682                                                | -411.668682    | 0.000000    |
| NH <sub>3</sub>                                                            | -181.104899               | -39.396709                       | -220.501608                                                | -220.501610    | 0.000073    |
| HClO                                                                       | -534.765672               | -23.389459                       | -558.155131                                                | -558.155128    | 0.000110    |
| PM6-D3                                                                     |                           |                                  |                                                            |                |             |
| H <sub>2</sub>                                                             | -15.269572                | -12.769707                       | -28.039279                                                 | -28.039280     | 0.000037    |
| N <sub>2</sub>                                                             | -322.971566               | -34.971743                       | -357.943309                                                | -357.943310    | 0.000037    |
| CO                                                                         | -385.860602               | -25.808080                       | -411.668682                                                | -411.668682    | 0.000000    |
| NH <sub>3</sub>                                                            | -181.104899               | -39.396709                       | -220.501608                                                | -220.501610    | 0.000073    |
| HClO                                                                       | -534.766427               | -23.388695                       | -558.155122                                                | -558.155123    | 0.000037    |
| PM6-DH+                                                                    |                           |                                  |                                                            |                |             |
| H <sub>2</sub>                                                             | -15.269572                | -12.769707                       | -28.039279                                                 | -28.039280     | 0.000037    |
| N <sub>2</sub>                                                             | -322.971566               | -34.971743                       | -357.943309                                                | -357.943310    | 0.000037    |
| CO                                                                         | -385.860602               | -25.808080                       | -411.668682                                                | -411.668682    | 0.000000    |
| NH <sub>3</sub>                                                            | -181.104899               | -39.396709                       | -220.501608                                                | -220.501610    | 0.000073    |
| HClO                                                                       | -534.765694               | -23.389434                       | -558.155128                                                | -558.155128    | 0.000000    |
| PM6-DH2                                                                    |                           |                                  |                                                            |                |             |
| H <sub>2</sub>                                                             | -15.269572                | -12.769707                       | -28.039279                                                 | -28.039280     | 0.000037    |
| N <sub>2</sub>                                                             | -322.971566               | -34.971743                       | -357.943309                                                | -357.943310    | 0.000037    |
| CO                                                                         | -385.860602               | -25.808080                       | -411.668682                                                | -411.668682    | 0.000000    |
| NH <sub>3</sub>                                                            | -181.104899               | -39.396709                       | -220.501608                                                | -220.501610    | 0.000073    |
| HClO                                                                       | -534.765694               | -23.389434                       | -558.155128                                                | -558.155128    | 0.000000    |
| PM6-DH2X                                                                   |                           |                                  |                                                            |                |             |
| H <sub>2</sub>                                                             | -15.269572                | -12.769707                       | -28.039279                                                 | -28.039280     | 0.000037    |
| N <sub>2</sub>                                                             | -322.971566               | -34.971743                       | -357.943309                                                | -357.943310    | 0.000037    |
| CO                                                                         | -385.860602               | -25.808080                       | -411.668682                                                | -411.668682    | 0.000000    |
| NH <sub>3</sub>                                                            | -181.104899               | -39.396709                       | -220.501608                                                | -220.501610    | 0.000073    |
| HClO                                                                       | -536.754491               | -17.648688                       | -554.403179                                                | -554.403179    | 0.000000    |
| PM6-D3H4                                                                   |                           |                                  |                                                            |                |             |
| H <sub>2</sub>                                                             | -15.269572                | -12.769707                       | -28.039279                                                 | -28.039280     | 0.000037    |
| N <sub>2</sub>                                                             | -322.971566               | -34.971743                       | -357.943309                                                | -357.943310    | 0.000037    |
| CO                                                                         | -385.860602               | -25.808080                       | -411.668682                                                | -411.668682    | 0.000000    |
| NH <sub>3</sub>                                                            | -181.104899               | -39.396709                       | -220.501608                                                | -220.501610    | 0.000073    |
| HClO                                                                       | -534.765680               | -23.389445                       | -558.155125                                                | -558.155128    | 0.000110    |
| PM6-D3H4X                                                                  |                           |                                  |                                                            |                |             |
| H <sub>2</sub>                                                             | -15.269572                | -12.769707                       | -28.039279                                                 | -28.039280     | 0.000037    |
| N <sub>2</sub>                                                             | -322.971566               | -34.971743                       | -357.943309                                                | -357.943310    | 0.000037    |
| CO                                                                         | -385.860602               | -25.808080                       | -411.668682                                                | -411.668682    | 0.000000    |
| NH <sub>3</sub>                                                            | -181.104899               | -39.396709                       | -220.501608                                                | -220.501610    | 0.000073    |
| HClO                                                                       | -536.757302               | -17.626171                       | -554.383473                                                | -554.383475    | 0.000073    |
| RM1                                                                        |                           |                                  |                                                            |                |             |
| H <sub>2</sub>                                                             | -16.929748                | -11.592167                       | -28.521915                                                 | -28.521913     | 0.000073    |
| N <sub>2</sub>                                                             | -381.275022               | -37.315433                       | -418.590455                                                | -418.590455    | 0.000000    |
| CO                                                                         | -412.462697               | -26.553402                       | -439.016099                                                | -439.016100    | 0.000037    |
| NH <sub>3</sub>                                                            | -211.262055               | -41.680241                       | -252.942296                                                | -252.942296    | 0.000000    |
| HClO                                                                       | -690.400279               | -23.077575                       | -713.477854                                                | -713.477854    | 0.000000    |

Table S2: Continuation of Table S8. Values of IQA net,  $\sum_A E_{\text{net}}^A$ , interaction,  $\sum_{A<B} E_{\text{int}}^{AB}$ , and total,  $\sum_A E_{\text{net}}^A + \sum_{A<B} E_{\text{int}}^{AB}$ , electronic energies of the molecules considered herein for different semiempirical methods. The chart also displays the values of the molecular energies  $E(\text{PM7})$  computed with MOPAC2016. Atomic units are used throughout except for the error in the recovery of the electronic energy by the IQA partition reported in the last column in mHa.

## Hydrogen bond energies and values of $E_{\text{int}}^{\mathcal{GH}'}$

| Water molecule pairs | EHB       | $E_{\text{int}}^{\mathcal{GH}'}$ |
|----------------------|-----------|----------------------------------|
| 3-2                  | -0.000006 | -2.022617                        |
| 5-3                  | -0.045612 | -3.108423                        |
| 7-1                  | -0.137158 | -3.451541                        |
| 9-4                  | -0.003379 | -0.760560                        |
| 14-7                 | -1.754451 | -3.936458                        |
| 14-8                 | -1.812364 | -3.324154                        |
| 16-1                 | -2.007051 | -3.313454                        |
| 18-14                | -0.005424 | -2.3577564                       |
| 21-7                 | -0.052953 | -3.412914                        |
| 21-8                 | -1.152567 | -2.452696                        |
| 22-12                | -2.880642 | -5.347486                        |
| 23-18                | -1.050540 | -3.705230                        |
| 24-11                | -0.005485 | -3.067998                        |
| 24-16                | -0.530310 | -1.852868                        |
| 26-2                 | -0.537082 | -2.674908                        |
| 26-9                 | -0.200164 | -0.657087                        |
| 27-25                | -1.913713 | -3.813568                        |

Table S3: Hydrogen bond and interaction energies  $E_{\text{int}}^{\mathcal{GH}'}$  (Equation (24) in the main body of the paper) among H-bonded pairs of water molecules in the cluster  $(\text{H}_2\text{O})_{30}$ . All values are reported in kcal/mol.

<sup>0a</sup> Instituto de Química, Universidad Nacional Autónoma de México, Circuito Exterior, Ciudad Universitaria, Alcaldía Coyoacán C.P. 04510, Ciudad de México, México. E-mail: tomasrocharinza@gmail.com

<sup>0b</sup> MDEA Materials Institute, C/Eric Kandel 2, 28906 - Getafe, Madrid, Spain.

<sup>0c</sup> Departamento de Química Física y Analítica, Universidad de Oviedo, Julián Clavería 8, 33006, Oviedo, España.

| Water molecule pairs | EHB       | $E_{\text{int}}^{\mathcal{GH}'}$ |
|----------------------|-----------|----------------------------------|
| 7-3                  | -0.000002 | -2.816891                        |
| 14-8                 | -0.083461 | -2.478293                        |
| 17-13                | -0.716981 | -1.286778                        |
| 19-12                | -0.000030 | -1.434458                        |
| 22-19                | -0.083297 | -2.100631                        |
| 23-10                | -1.419183 | -3.466622                        |
| 28-5                 | -0.079743 | -2.620000                        |
| 30-29                | -0.108119 | -0.013583                        |
| 33-13                | -0.003693 | -0.308389                        |
| 37-6                 | -0.264614 | -3.694253                        |
| 37-25                | -0.006063 | -1.626079                        |
| 38-13                | -0.905103 | -1.755668                        |
| 39-1                 | -0.005728 | -2.263369                        |
| 39-24                | -0.609248 | -1.877705                        |
| 40-33                | -0.015430 | -1.677585                        |
| 41-29                | -0.007598 | -1.724375                        |
| 42-32                | -0.001348 | -2.491161                        |
| 44-2                 | -0.117848 | -2.580083                        |
| 45-23                | -0.085679 | -2.501700                        |
| 45-43                | -0.001506 | -2.430397                        |
| 46-18                | -0.243271 | 0.284060                         |
| 46-28                | -0.630453 | -2.674954                        |
| 46-33                | -1.758792 | -2.281656                        |
| 47-6                 | -0.894470 | -0.943453                        |
| 47-25                | -0.000044 | -1.584974                        |
| 47-41                | -0.000046 | -2.642623                        |
| 48-12                | -0.022346 | -1.545840                        |
| 49-16                | -2.269660 | -2.934846                        |
| 49-25                | -0.013517 | -1.874960                        |
| 50-12                | -0.007181 | -1.754815                        |
| 50-26                | -1.256747 | -2.289151                        |

Table S4: Hydrogen bond and interaction energies  $E_{\text{int}}^{\mathcal{GH}'}$  (Equation (24) in the main body of the paper) among H-bonded pairs of water molecules in the cluster  $(\text{H}_2\text{O})_{50}$ . All values are reported in kcal/mol.

| Water molecule pairs | EHB       | $E_{\text{int}}^{\mathcal{GH}'}$ | Water molecule pairs | EHB       | $E_{\text{int}}^{\mathcal{GH}'}$ |
|----------------------|-----------|----------------------------------|----------------------|-----------|----------------------------------|
| 19 – 16              | -0.000197 | -2.227487                        | 65 – 53              | -0.002837 | -1.491717                        |
| 21 – 4               | -0.039860 | -1.540237                        | 67 – 47              | -0.001689 | -3.432769                        |
| 22 – 6               | -0.024179 | -0.737361                        | 68 – 29              | -1.211491 | -1.745130                        |
| 29 – 5               | -0.000003 | -2.914345                        | 69 – 23              | -1.054229 | -1.679638                        |
| 29 – 14              | -0.008592 | -1.015817                        | 69 – 63              | -0.007605 | -2.701773                        |
| 33 – 16              | -3.608194 | -3.581717                        | 70 – 34              | -0.006189 | -3.163030                        |
| 34 – 17              | -0.000043 | -2.067908                        | 71 – 25              | -0.000005 | -2.567492                        |
| 34 – 33              | -0.311582 | -0.721979                        | 72 – 3               | -0.003322 | -2.210883                        |
| 35 – 5               | -0.454819 | -2.551557                        | 73 – 24              | -0.000198 | -3.261891                        |
| 36 – 15              | -0.000049 | -1.496883                        | 73 – 52              | -0.060175 | -1.218565                        |
| 37 – 35              | -0.091170 | -3.674075                        | 74 – 9               | -0.023018 | -1.694143                        |
| 39 – 6               | -1.266469 | -4.344998                        | 74 – 27              | -1.624030 | -3.859366                        |
| 39 – 13              | -0.206905 | -0.393482                        | 77 – 56              | -0.970392 | -1.997227                        |
| 41 – 5               | -2.094915 | -3.415520                        | 78 – 58              | -0.001317 | -1.426733                        |
| 41 – 19              | -0.169654 | -3.599243                        | 78 – 69              | -2.396407 | -3.046390                        |
| 42 – 36              | -0.001601 | -1.526285                        | 80 – 24              | -0.975322 | -1.360918                        |
| 46 – 26              | -0.237506 | -2.583288                        | 83 – 49              | -1.738256 | -3.971994                        |
| 47 – 18              | -0.441031 | -2.201844                        | 83 – 73              | -0.003874 | -2.860038                        |
| 48 – 46              | -0.435624 | -2.430351                        | 84 – 5               | -0.007066 | -2.340645                        |
| 50 – 44              | -0.028699 | -0.670278                        | 85 – 37              | -1.404687 | -3.137917                        |
| 51 – 30              | -0.000168 | -2.606625                        | 86 – 14              | -0.025901 | -2.525844                        |
| 53 – 7               | -0.131073 | -1.768744                        | 87 – 15              | -1.247557 | -2.119264                        |
| 55 – 39              | -0.017713 | -0.420209                        | 87 – 24              | -0.708668 | -2.138381                        |
| 55 – 53              | -0.479326 | -2.087141                        | 88 – 9               | -0.012759 | -2.119541                        |
| 56 – 8               | -0.516350 | -3.497938                        | 88 – 33              | -3.300223 | -3.004281                        |
| 56 – 14              | -0.000271 | -1.002396                        | 88 – 48              | -0.202718 | -2.229124                        |
| 56 – 41              | -0.000915 | -0.835391                        | 88 – 81              | -2.657339 | -4.950591                        |
| 57 – 15              | -0.174266 | -1.161813                        | 89 – 7               | -1.493204 | -1.726543                        |
| 57 – 32              | -0.000125 | -0.530047                        | 93 – 76              | -0.056556 | -1.813504                        |
| 57 – 36              | -0.236586 | -0.517479                        | 93 – 81              | -2.337041 | -2.287675                        |
| 57 – 52              | -0.002807 | -0.711648                        | 94 – 54              | -0.004423 | -0.002675                        |
| 58 – 23              | -0.000047 | -2.742360                        | 97 – 65              | -0.687034 | -1.293973                        |
| 59 – 30              | -0.000667 | -1.160222                        | 97 – 86              | -0.000001 | -3.201449                        |
| 60 – 7               | -0.000263 | -1.117537                        | 98 – 27              | -0.242693 | -3.247155                        |
| 63 – 59              | -0.073083 | -1.675095                        | 99 – 20              | -1.630887 | -1.371134                        |

Table S5: Hydrogen bond and interaction energies  $E_{\text{int}}^{\mathcal{GH}'}$  (Equation (24) in the main body of the paper) among H-bonded pairs of water molecules in the cluster  $(\text{H}_2\text{O})_{100}$ . All values are reported in kcal/mol.

| Water molecule pairs | EHB       | $E_{\text{int}}^{\mathcal{GH}'}$ | Water molecule pairs | EHB       | $E_{\text{int}}^{\mathcal{GH}'}$ |
|----------------------|-----------|----------------------------------|----------------------|-----------|----------------------------------|
| 12 – 9               | -0.691822 | -1.042909                        | 108 – 90             | -0.341994 | -0.452344                        |
| 27 – 6               | -0.159476 | -0.456971                        | 109 – 25             | -1.080919 | -2.475322                        |
| 29 – 9               | -0.270858 | -1.511565                        | 109 – 74             | -2.226470 | -2.614476                        |
| 33 – 30              | -0.008643 | -1.055631                        | 110 – 37             | -0.296594 | -0.905019                        |
| 39 – 22              | -3.450598 | -5.330012                        | 111 – 6              | -0.014099 | -0.016604                        |
| 39 – 24              | -2.015294 | -1.199764                        | 111 – 48             | -1.856550 | -2.134269                        |
| 40 – 20              | -4.456852 | -0.650586                        | 112 – 104            | -1.065536 | 3.389285                         |
| 40 – 23              | -0.056055 | 0.182803                         | 115 – 4              | -0.081380 | -1.475122                        |
| 41 – 36              | -2.426032 | -3.970086                        | 116 – 77             | -3.900760 | -1.846719                        |
| 44 – 5               | -0.157814 | 0.359113                         | 117 – 84             | -1.201139 | -2.546104                        |
| 47 – 32              | -2.276941 | -0.136133                        | 119 – 2              | -0.160606 | -0.947191                        |
| 50 – 48              | -0.491112 | -1.573069                        | 119 – 43             | -0.150313 | -1.300087                        |
| 54 – 4               | -0.297458 | 2.813982                         | 119 – 62             | -0.316561 | -1.108872                        |
| 55 – 21              | -0.300600 | -1.263516                        | 120 – 104            | -0.272533 | -0.338370                        |
| 56 – 9               | -0.523780 | -1.214881                        | 120 – 117            | -3.277148 | -2.730544                        |
| 56 – 12              | -0.000134 | -0.026585                        | 124 – 53             | -0.668437 | -0.883009                        |
| 57 – 15              | -2.158796 | -1.279434                        | 124 – 100            | -0.090731 | -0.913204                        |
| 58 – 11              | -0.007037 | -0.481295                        | 125 – 27             | -0.553055 | -0.532715                        |
| 60 – 49              | -0.124048 | -1.425608                        | 128 – 16             | -1.034524 | -1.663777                        |
| 61 – 54              | -0.164395 | 1.355321                         | 128 – 59             | -2.008916 | -1.630087                        |
| 64 – 42              | -0.084702 | -0.515365                        | 128 – 91             | -0.285734 | -1.100884                        |
| 66 – 35              | -1.012397 | -1.506313                        | 130 – 32             | -0.792058 | 0.438343                         |
| 67 – 48              | -0.122567 | -1.538335                        | 131 – 68             | -0.773734 | -2.221431                        |
| 74 – 53              | -4.237664 | -2.748248                        | 133 – 39             | -0.574475 | -0.927391                        |
| 75 – 11              | -0.267101 | -0.184855                        | 133 – 77             | -0.000006 | 0.015705                         |
| 78 – 50              | -0.636840 | 0.001759                         | 135 – 93             | -0.004696 | -1.028272                        |
| 80 – 51              | -1.128976 | -2.401244                        | 137 – 4              | -2.617869 | -0.960854                        |
| 83 – 37              | -0.780777 | -0.341542                        | 137 – 46             | -0.566781 | -0.293062                        |
| 87 – 74              | -0.051249 | -1.720266                        | 137 – 64             | -2.739930 | -1.222303                        |
| 90 – 8               | -1.623701 | -1.391799                        | 143 – 34             | -2.759779 | -1.751643                        |
| 90 – 31              | -2.823889 | -3.046743                        | 143 – 53             | -3.677431 | -3.229644                        |
| 95 – 81              | -1.551309 | 3.454529                         | 145 – 73             | 0.000000  | 0.015019                         |
| 96 – 32              | -0.904875 | -1.085118                        | 145 – 86             | -1.538323 | 1.123850                         |
| 99 – 2               | -1.673398 | -2.330216                        | 145 – 90             | -1.092117 | -0.489550                        |
| 99 – 66              | -0.747178 | -1.708197                        | 145 – 103            | -0.337408 | 0.178756                         |
| 100 – 8              | -1.795912 | -1.019869                        | 145 – 138            | -0.457938 | 0.164905                         |
| 100 – 74             | -0.627167 | -1.474435                        | 146 – 123            | -2.203967 | 0.722382                         |
| 101 – 5              | -1.399095 | -0.411546                        | 147 – 19             | -0.994542 | -0.414175                        |
| 103 – 73             | -1.288773 | -1.209797                        | 147 – 26             | -0.406203 | 0.407905                         |
| 104 – 9              | -0.558664 | -0.964844                        | 147 – 40             | -1.538132 | 0.459628                         |
| 107 – 62             | -0.664067 | -1.028774                        | 149 – 62             | -0.000006 | 0.221997                         |
| 108 – 34             | -0.332425 | -0.113812                        | 149 – 68             | -0.809266 | -2.032109                        |
| 108 – 73             | -0.460509 | 0.048539                         | 149 – 119            | -0.232606 | -0.710792                        |

Table S6: Hydrogen bond and interaction energies  $E_{\text{int}}^{\mathcal{GH}'}$  (Equation (24) in the main body of the paper) among H-bonded species in the solvation of the caprylate anion. The caprylate anion is labelled with the number 201. All values are reported in kcal/mol.

| Water molecule pairs | EHB       | $E_{\text{int}}^{\mathcal{GH}'}$ | Water molecule pairs | EHB       | $E_{\text{int}}^{\mathcal{GH}'}$ |
|----------------------|-----------|----------------------------------|----------------------|-----------|----------------------------------|
| 150 – 111            | -0.503210 | 2.150317                         | 179 – 52             | -2.245503 | 0.123698                         |
| 152 – 86             | -0.571686 | 1.602647                         | 179 – 169            | -1.583256 | -0.954971                        |
| 153 – 22             | -2.331732 | -2.108603                        | 180 – 59             | -0.117616 | -1.318904                        |
| 153 – 67             | -0.606239 | -1.502194                        | 180 – 84             | -0.807232 | -1.819573                        |
| 153 – 133            | -1.397548 | -1.178762                        | 180 – 128            | -0.000134 | -0.244620                        |
| 154 – 56             | -1.903782 | 0.438601                         | 181 – 123            | -0.010739 | -0.898790                        |
| 155 – 22             | -0.666496 | 0.041335                         | 181 – 141            | -2.330332 | -0.961872                        |
| 155 – 70             | -0.103171 | 0.228416                         | 182 – 64             | -4.707212 | -1.225399                        |
| 156 – 94             | -0.034885 | 1.216250                         | 182 – 76             | -0.726549 | -0.781385                        |
| 156 – 136            | -0.658021 | 0.194469                         | 184 – 110            | -1.208386 | -1.327679                        |
| 157 – 50             | -0.422286 | -0.880633                        | 184 – 118            | -0.019733 | -0.136962                        |
| 157 – 129            | -2.210934 | 0.373945                         | 184 – 137            | -0.168867 | -0.829375                        |
| 158 – 136            | -2.046035 | -2.981389                        | 184 – 152            | -0.107590 | -0.293602                        |
| 159 – 15             | -1.797378 | -0.349957                        | 186 – 172            | -4.676661 | -3.328032                        |
| 159 – 150            | -0.239251 | 1.744264                         | 187 – 89             | -0.814012 | 2.867015                         |
| 160 – 100            | -1.806660 | 0.082844                         | 188 – 22             | -1.842196 | -2.309634                        |
| 161 – 43             | -0.458240 | 0.983344                         | 188 – 51             | -2.396630 | -2.624057                        |
| 162 – 75             | -0.186386 | -1.176214                        | 189 – 28             | -0.796857 | -0.075292                        |
| 162 – 135            | -2.281445 | -2.426044                        | 190 – 140            | -1.081099 | -0.553703                        |
| 163 – 37             | -0.432633 | -0.925902                        | 191 – 182            | -2.928615 | 0.456710                         |
| 163 – 83             | -0.000632 | 0.046139                         | 192 – 62             | -1.946318 | -2.086933                        |
| 163 – 118            | -0.493443 | 0.064172                         | 192 – 139            | -0.686582 | -1.128650                        |
| 165 – 33             | -0.151079 | 0.479834                         | 193 – 60             | -3.389027 | -2.352357                        |
| 166 – 28             | -0.585122 | -0.293584                        | 194 – 48             | -3.351003 | -2.032998                        |
| 166 – 39             | -2.121141 | -1.228001                        | 194 – 71             | -0.365920 | -0.505322                        |
| 166 – 77             | -2.313801 | -0.653621                        | 194 – 77             | -2.348553 | -1.054344                        |
| 166 – 93             | -2.349592 | -0.210243                        | 194 – 85             | -2.036958 | -0.217829                        |
| 166 – 133            | -0.316515 | -0.044354                        | 195 – 71             | -0.840335 | -1.700635                        |
| 168 – 27             | -0.084676 | 0.015194                         | 195 – 162            | -1.918579 | -3.270078                        |
| 168 – 45             | -0.281990 | -0.006094                        | 196 – 129            | -0.999535 | 2.117401                         |
| 170 – 141            | -0.971627 | -1.781690                        | 197 – 122            | -1.557282 | 1.621049                         |
| 171 – 43             | -0.309928 | -0.951689                        | 198 – 188            | -2.008342 | 1.143232                         |
| 171 – 107            | -0.730844 | -0.352110                        | 199 – 35             | -2.081518 | 0.252122                         |
| 171 – 116            | -0.050243 | -0.588908                        | 199 – 119            | -1.026023 | 0.022229                         |
| 172 – 71             | -3.523410 | -3.181378                        | 199 – 192            | -2.641307 | 0.215857                         |
| 174 – 16             | -3.433334 | -2.270959                        | 200 – 115            | -0.340023 | -1.634607                        |
| 175 – 79             | -1.175608 | 1.455556                         | 201 – 12             | -1.513619 | -1.399018                        |
| 175 – 80             | -1.711963 | -0.497978                        | 201 – 69             | -0.016202 | 1.273797                         |
| 176 – 127            | -0.671013 | -1.058121                        | 201 – 89             | -2.086218 | -0.483670                        |
| 177 – 78             | -1.610634 | 0.403106                         | 201 – 92             | -2.305526 | -3.393633                        |
| 177 – 107            | -3.434137 | -0.736354                        | 201 – 117            | -0.261533 | -2.052919                        |
| 179 – 36             | -0.070650 | -1.724097                        | 201 – 162            | -0.809776 | -1.993736                        |

Table S7: Continuation of Table S4. Hydrogen bond and interaction energies  $E_{\text{int}}^{\mathcal{GH}'}$  (Equation (24) in the main body of the paper) among H-bonded species in the solvation of the caprylate anion. The caprylate anion is labelled with the number 201. All values are reported in kcal/mol.

| Water molecule pairs | EHB       | $E_{\text{int}}^{\mathcal{GH}'}$ | Water molecule pairs | EHB       | $E_{\text{int}}^{\mathcal{GH}'}$ |
|----------------------|-----------|----------------------------------|----------------------|-----------|----------------------------------|
| 208 – 92             | -2.305526 | -9.763073                        | 200 – 115            | -0.340023 | -1.634607                        |
| 208 – 180            | -2.452700 | -8.456566                        | 128 – 59             | -2.008916 | -1.630087                        |
| 208 – 12             | -1.513619 | -6.255936                        | 50 – 48              | -0.491112 | -1.573069                        |
| 208 – 89             | -2.086218 | -6.228136                        | 67 – 48              | -0.122567 | -1.538335                        |
| 208 – 117            | -0.261533 | -5.830420                        | 29 – 9               | -0.270858 | -1.511565                        |
| 39 – 22              | -3.450598 | -5.330012                        | 66 – 35              | -1.012397 | -1.506313                        |
| 41 – 36              | -2.426032 | -3.970086                        | 153 – 67             | -0.606239 | -1.502194                        |
| 186 – 172            | -4.676661 | -3.328032                        | 115 – 4              | -0.081380 | -1.475122                        |
| 208 – 162            | -0.809776 | -3.301172                        | 100 – 74             | -0.627167 | -1.474435                        |
| 195 – 162            | -1.918579 | -3.270078                        | 60 – 49              | -0.124048 | -1.425608                        |
| 143 – 53             | -3.677431 | -3.229644                        | 90 – 8               | -1.623701 | -1.391799                        |
| 172 – 71             | -3.523410 | -3.181378                        | 184 – 110            | -1.208386 | -1.327679                        |
| 90 – 31              | -2.823889 | -3.046743                        | 180 – 59             | -0.117616 | -1.318904                        |
| 158 – 136            | -2.046035 | -2.981389                        | 119 – 43             | -0.150313 | -1.300087                        |
| 74 – 53              | -4.237664 | -2.748248                        | 57 – 15              | -2.158796 | -1.279434                        |
| 120 – 117            | -3.277148 | -2.730544                        | 55 – 21              | -0.300600 | -1.263516                        |
| 188 – 51             | -2.396630 | -2.624057                        | 166 – 39             | -2.121141 | -1.228001                        |
| 109 – 74             | -2.226470 | -2.614476                        | 182 – 64             | -4.707212 | -1.225399                        |
| 117 – 84             | -1.201139 | -2.546104                        | 137 – 64             | -2.739930 | -1.222303                        |
| 109 – 25             | -1.080919 | -2.475322                        | 56 – 9               | -0.523780 | -1.214881                        |
| 162 – 135            | -2.281445 | -2.426044                        | 103 – 73             | -1.288773 | -1.209797                        |
| 80 – 51              | -1.128976 | -2.401244                        | 39 – 24              | -2.015294 | -1.199764                        |
| 193 – 60             | -3.389027 | -2.352357                        | 153 – 133            | -1.397548 | -1.178762                        |
| 99 – 2               | -1.673398 | -2.330216                        | 162 – 75             | -0.186386 | -1.176214                        |
| 188 – 22             | -1.842196 | -2.309634                        | 192 – 139            | -0.686582 | -1.128650                        |
| 174 – 16             | -3.433334 | -2.270959                        | 119 – 62             | -0.316561 | -1.108872                        |
| 131 – 68             | -0.773734 | -2.221431                        | 128 – 91             | -0.285734 | -1.100884                        |
| 111 – 48             | -1.856550 | -2.134269                        | 96 – 32              | -0.904875 | -1.085118                        |
| 153 – 22             | -2.331732 | -2.108603                        | 176 – 127            | -0.671013 | -1.058121                        |
| 192 – 62             | -1.946318 | -2.086933                        | 33 – 30              | -0.008643 | -1.055631                        |
| 194 – 48             | -3.351003 | -2.032998                        | 194 – 77             | -2.348553 | -1.054344                        |
| 149 – 68             | -0.809266 | -2.032109                        | 12 – 9               | -0.691822 | -1.042909                        |
| 208 – 69             | -0.016202 | -1.918657                        | 107 – 62             | -0.664067 | -1.028774                        |
| 116 – 77             | -3.900760 | -1.846719                        | 135 – 93             | -0.004696 | -1.028272                        |
| 180 – 84             | -0.807232 | -1.819573                        | 100 – 8              | -1.795912 | -1.019869                        |
| 170 – 141            | -0.971627 | -1.781690                        | 104 – 9              | -0.558664 | -0.964844                        |
| 143 – 34             | -2.759779 | -1.751643                        | 181 – 141            | -2.330332 | -0.961872                        |
| 179 – 36             | -0.070650 | -1.724097                        | 137 – 4              | -2.617869 | -0.960854                        |
| 87 – 74              | -0.051249 | -1.720266                        | 179 – 169            | -1.583256 | -0.954971                        |
| 99 – 66              | -0.747178 | -1.708197                        | 171 – 43             | -0.309928 | -0.951689                        |
| 195 – 71             | -0.840335 | -1.700635                        | 119 – 2              | -0.160606 | -0.947191                        |
| 128 – 16             | -1.034524 | -1.663777                        | 133 – 39             | -0.574475 | -0.927391                        |

Table S8: Hydrogen bond and interaction energies  $E_{\text{int}}^{\mathcal{GH}'}$  (Equation (24) in the main body of the paper) among H-bonded species in the solvation of the caprylate anion. The caprylate anion was further partitioned into fragments. The number of each fragment within the caprylate anion is as follows: methylene ( $-\text{CH}_2$ , 201-206), methyl ( $-\text{CH}_3$ , 207) and carboxylate ( $-\text{COO}^-$ , 208). All values are reported in kcal/mol.



| Water molecule pairs | EHB       | $E_{\text{int}}^{\mathcal{GH}'}$ | Water molecule pairs | EHB       | $E_{\text{int}}^{\mathcal{GH}'}$ |
|----------------------|-----------|----------------------------------|----------------------|-----------|----------------------------------|
| 163 – 37             | -0.432633 | -0.925902                        | 78 – 50              | -0.636840 | 0.001759                         |
| 124 – 100            | -0.090731 | -0.913204                        | 168 – 27             | -0.084676 | 0.015194                         |
| 110 – 37             | -0.296594 | -0.905019                        | 133 – 77             | -0.000006 | 0.015705                         |
| 181 – 123            | -0.010739 | -0.898790                        | 199 – 119            | -1.026023 | 0.022229                         |
| 124 – 53             | -0.668437 | -0.883009                        | 155 – 22             | -0.666496 | 0.041335                         |
| 157 – 50             | -0.422286 | -0.880633                        | 108 – 73             | -0.460509 | 0.048539                         |
| 184 – 137            | -0.168867 | -0.829375                        | 163 – 118            | -0.493443 | 0.064172                         |
| 182 – 76             | -0.726549 | -0.781385                        | 160 – 100            | -1.806660 | 0.082844                         |
| 177 – 107            | -3.434137 | -0.736354                        | 179 – 52             | -2.245503 | 0.123698                         |
| 149 – 119            | -0.232606 | -0.710792                        | 145 – 138            | -0.457938 | 0.164905                         |
| 166 – 77             | -2.313801 | -0.653621                        | 145 – 103            | -0.337408 | 0.178756                         |
| 40 – 20              | -4.456852 | -0.650586                        | 40 – 23              | -0.056055 | 0.182803                         |
| 171 – 116            | -0.050243 | -0.588908                        | 156 – 136            | -0.658021 | 0.194469                         |
| 190 – 140            | -1.081099 | -0.553703                        | 199 – 192            | -2.641307 | 0.215857                         |
| 125 – 27             | -0.553055 | -0.532715                        | 149 – 62             | -0.000006 | 0.221997                         |
| 64 – 42              | -0.084702 | -0.515365                        | 155 – 70             | -0.103171 | 0.228416                         |
| 194 – 71             | -0.365920 | -0.505322                        | 199 – 35             | -2.081518 | 0.252122                         |
| 175 – 80             | -1.711963 | -0.497978                        | 44 – 5               | -0.157814 | 0.359113                         |
| 145 – 90             | -1.092117 | -0.489550                        | 157 – 129            | -2.210934 | 0.373945                         |
| 58 – 11              | -0.007037 | -0.481295                        | 177 – 78             | -1.610634 | 0.403106                         |
| 27 – 6               | -0.159476 | -0.456971                        | 147 – 26             | -0.406203 | 0.407905                         |
| 108 – 90             | -0.341994 | -0.452344                        | 130 – 32             | -0.792058 | 0.438343                         |
| 147 – 19             | -0.994542 | -0.414175                        | 154 – 56             | -1.903782 | 0.438601                         |
| 101 – 5              | -1.399095 | -0.411546                        | 191 – 182            | -2.928615 | 0.456710                         |
| 171 – 107            | -0.730844 | -0.352110                        | 147 – 40             | -1.538132 | 0.459628                         |
| 159 – 15             | -1.797378 | -0.349957                        | 165 – 33             | -0.151079 | 0.479834                         |
| 83 – 37              | -0.780777 | -0.341542                        | 146 – 123            | -2.203967 | 0.722382                         |
| 120 – 104            | -0.272533 | -0.338370                        | 161 – 43             | -0.458240 | 0.983344                         |
| 184 – 152            | -0.107590 | -0.293602                        | 145 – 86             | -1.538323 | 1.123850                         |
| 166 – 28             | -0.585122 | -0.293584                        | 198 – 188            | -2.008342 | 1.143232                         |
| 137 – 46             | -0.566781 | -0.293062                        | 156 – 94             | -0.034885 | 1.216250                         |
| 180 – 128            | -0.000134 | -0.244620                        | 61 – 54              | -0.164395 | 1.355321                         |
| 194 – 85             | -2.036958 | -0.217829                        | 175 – 79             | -1.175608 | 1.455556                         |
| 166 – 93             | -2.349592 | -0.210243                        | 152 – 86             | -0.571686 | 1.602647                         |
| 75 – 11              | -0.267101 | -0.184855                        | 197 – 122            | -1.557282 | 1.621049                         |
| 184 – 118            | -0.019733 | -0.136962                        | 159 – 150            | -0.239251 | 1.744264                         |
| 47 – 32              | -2.276941 | -0.136133                        | 196 – 129            | -0.999535 | 2.117401                         |
| 108 – 34             | -0.332425 | -0.113812                        | 150 – 111            | -0.503210 | 2.150317                         |
| 189 – 28             | -0.796857 | -0.075292                        | 54 – 4               | -0.297458 | 2.813982                         |
| 166 – 133            | -0.316515 | -0.044354                        | 187 – 89             | -0.814012 | 2.867015                         |
| 56 – 12              | -0.000134 | -0.026585                        | 112 – 104            | -1.065536 | 3.389285                         |
| 111 – 6              | -0.014099 | -0.016604                        | 95 – 81              | -1.551309 | 3.454529                         |
| 168 – 45             | -0.281990 | -0.006094                        |                      |           |                                  |

Table S9: Continuation of Table S6. Hydrogen bond and interaction energies  $E_{\text{int}}^{\mathcal{GH}'}$  (Equation (24) in the main body of the paper) among H-bonded species in the solvation of the caprylate anion. The caprylate anion was further partitioned into fragments. The number of each fragment within the caprylate anion is as follows: methylene ( $-\text{CH}_2$ , 201-206), methyl ( $-\text{CH}_3$ , 207) and carboxylate ( $-\text{COO}^-$ , 208). All values are reported in kcal/mol.
